# Supplementary material
Source: PubMed Central journal article supplement (PMC7933100)
Supplement: NIHMS1663095-supplement-1.pdf [file NIHMS1663095-supplement-1.pdf]

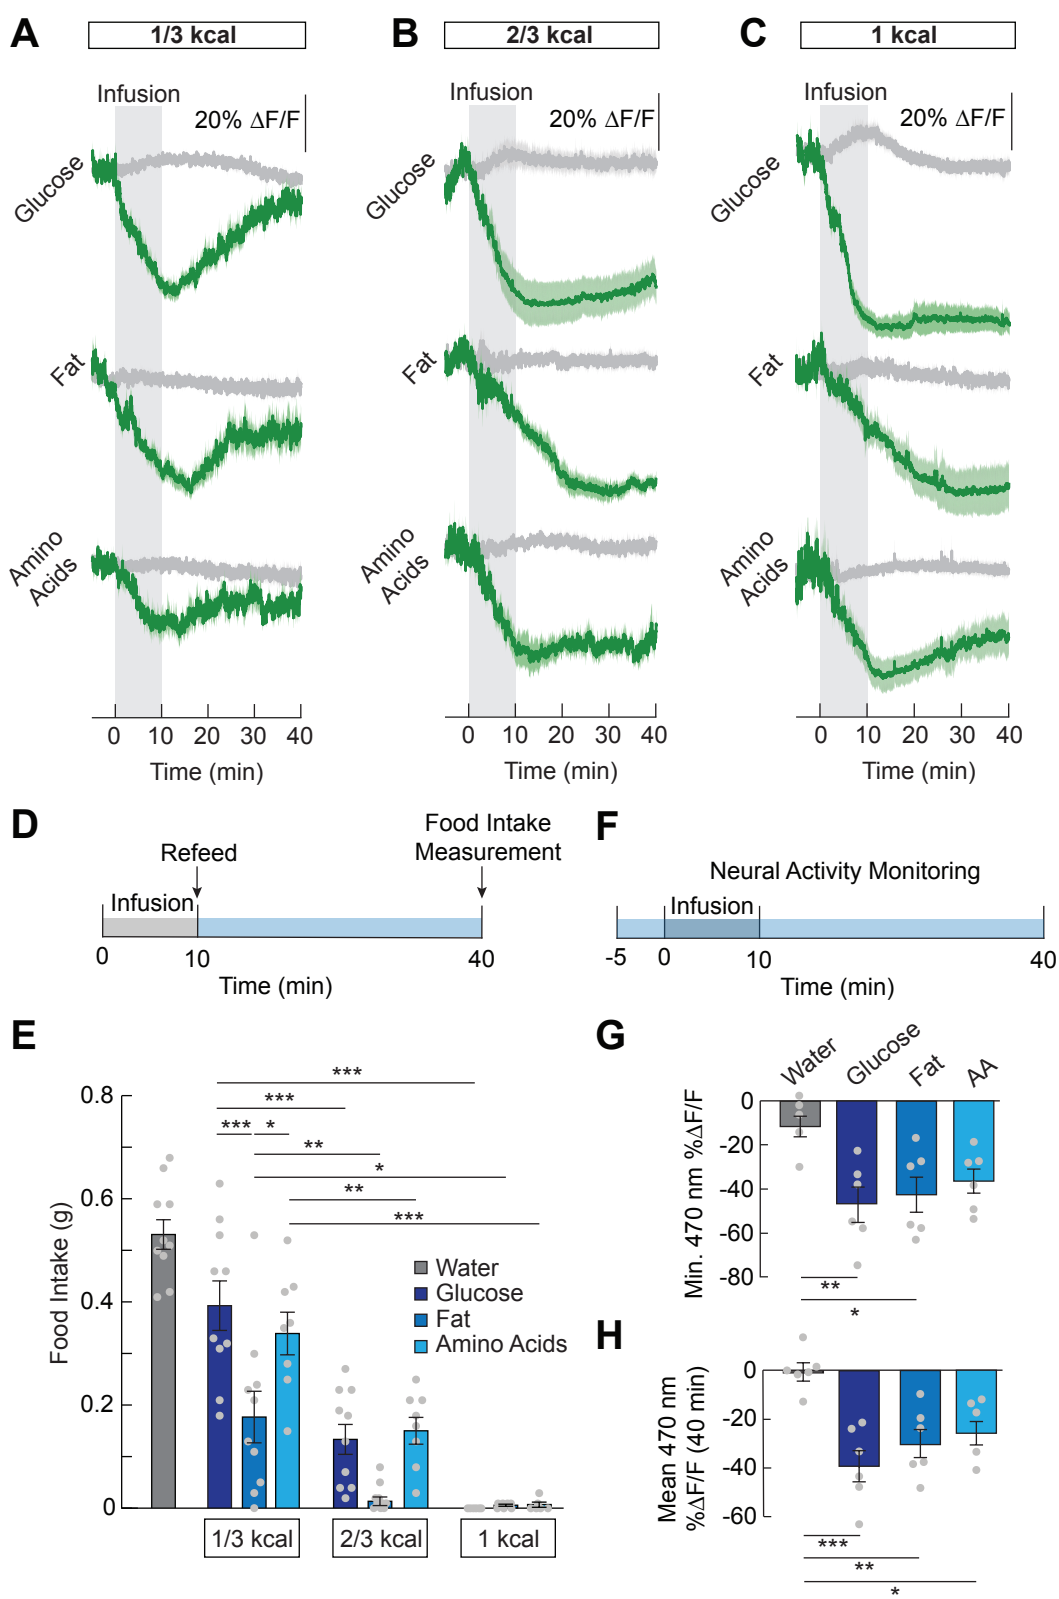

Figure S1, Related to Figure 1

**Figure S1, Related to Figure 1. Intra-duodenal macronutrients inhibit AgRP neuron activity and suppress food intake.** (A-C) AgRP neuron activity changes in response to intra-duodenal infusion of 1/3 (A), 2/3 (B), or 1 (C) kcal of glucose, fat, or amino acids. Signals are aligned to the start of the infusion. Green, 470-nm calcium signal; grey, 405-nm control signal. Dark lines represent means and lighter shaded areas represent SEM. (D) Food intake was monitored for 30 min following a 10-min infusion of macronutrients in food-restricted mice. (E) Total chow intake after intra-duodenal (ID) infusion of water, glucose, fat, or amino acids (n=6-10/group, one-way ANOVA,  $p < 0.001$ ). (F) AgRP neuron activity was monitored in response to a 10-min infusion of macronutrients in food-restricted mice. (G) Minimum  $\Delta F/F$  of the 470-nm signal in AgRP neurons following ID infusion of water, glucose (2/3 kcal), fat (1 kcal), and amino acids (1 kcal, n=6/group, one-way ANOVA,  $p < 0.01$ ). (H) Mean  $\Delta F/F$  of the 470-nm signal in AgRP neurons following ID infusion of water, glucose, fat, and amino acids (n=6/group, one-way ANOVA,  $p < 0.001$ ). Data are expressed as mean  $\pm$  SEM, ns  $p > 0.05$ , t-tests and post-hoc comparisons: \* $p < 0.05$ , \*\* $p < 0.01$ , \*\*\* $p < 0.001$ .

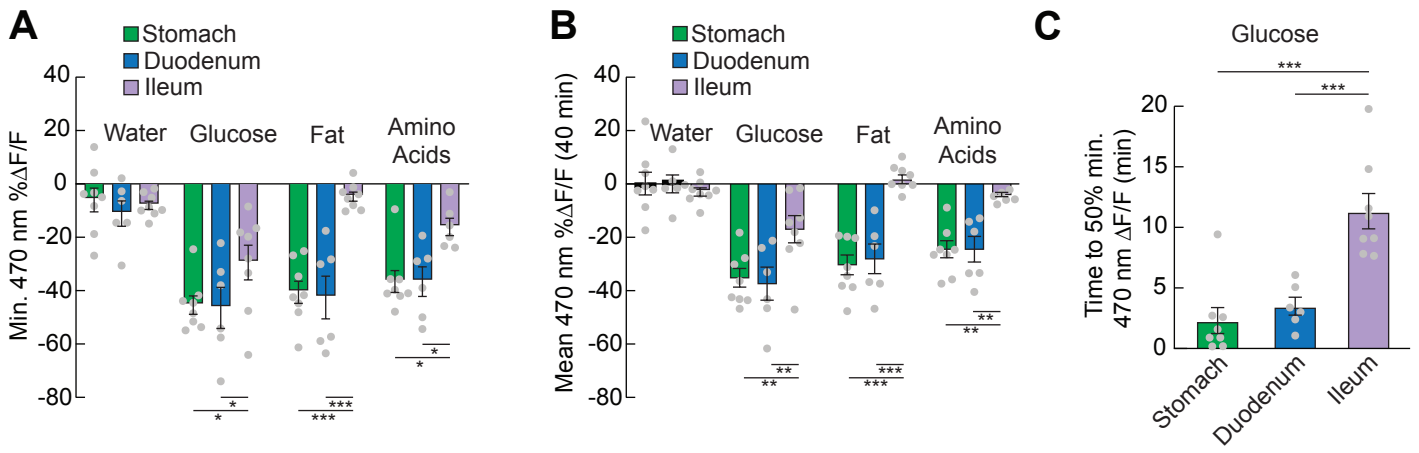

Figure S2, Related to Figure 1

**Figure S2, Related to Figure 1. Macronutrient effects on AgRP neuron activity along the gastrointestinal tract.** (A) Minimum  $\Delta F/F$  of the 470-nm signal in AgRP neurons with infusions of water, glucose (2/3 kcal), fat (1 kcal) or amino acids (1 kcal) in the stomach (green), duodenum (blue), and ileum (purple, n=6-8/group, two-way ANOVA,  $p < 0.01$ ). (B) Mean  $\Delta F/F$  of the 470-nm signal in AgRP neurons with infusions of water, glucose, fat, or amino acids in the stomach, duodenum, and ileum (n=6-8/group, two-way ANOVA,  $p < 0.001$ ). (C) Latency to 50% maximum reduction in  $\Delta F/F$  during infusion of 2/3 kcal glucose (n=6-8/group, one-way ANOVA,  $p < 0.001$ ). Data are expressed as mean  $\pm$  SEM, ns  $p > 0.05$ , t-tests and post-hoc comparisons: \* $p < 0.05$ , \*\* $p < 0.01$ , \*\*\* $p < 0.001$ .

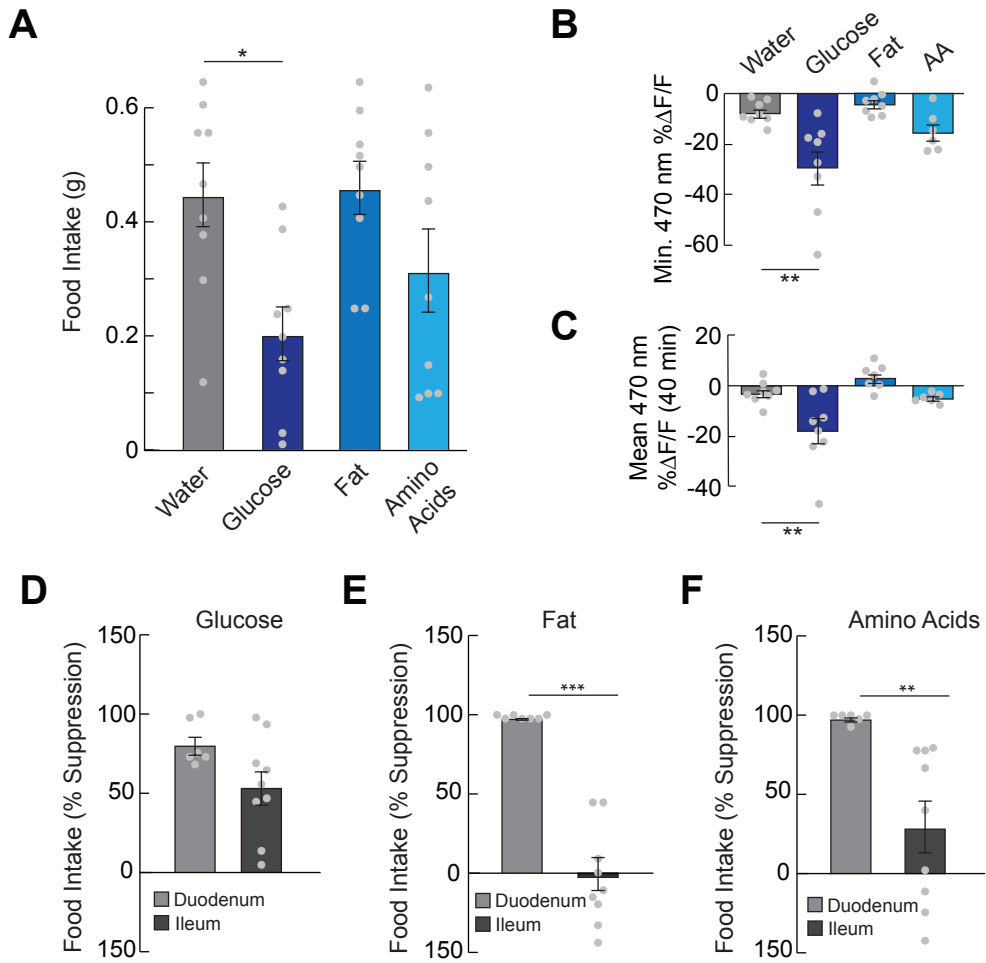

Figure S3, Related to Figure 1

**Figure S3, Related to Figure 1. Intra-ileal infusion of glucose, but not fat or protein, inhibits AgRP neuron activity and suppresses food intake.** (A) Total chow intake 30 mins after intra-ileal (Il) infusion of water, glucose (2/3 kcal), fat (1 kcal), or amino acids (1 kcal) (n=9/group, one-way ANOVA,  $p < 0.01$ ). (B) Minimum  $\Delta F/F$  of the 470-nm signal in AgRP neurons following Il infusion of water, glucose, fat, or amino acids (n=6-8/group, one-way ANOVA,  $p < 0.01$ ). (C) Mean  $\Delta F/F$  of the 470-nm signal in AgRP neurons following Il infusion of water, glucose, fat, or amino acids (n=6-8/group, one-way ANOVA,  $p < 0.001$ ). (D-F) Food intake suppression following infusions of (D) glucose (n=6-9/group, unpaired t-test,  $p = 0.08$ ) (E) fat (n=7-9/group, unpaired t-test,  $p < 0.001$ ) and (F) amino acids (n=6-9/group, unpaired t-test,  $p < 0.01$ ) in the duodenum (light grey) or ileum (dark grey) normalized to food intake after water infusion. Data are expressed as mean  $\pm$  SEM, ns  $p > 0.05$ , t-tests and post-hoc comparisons: \* $p < 0.05$ , \*\* $p < 0.01$ , \*\*\* $p < 0.001$ .

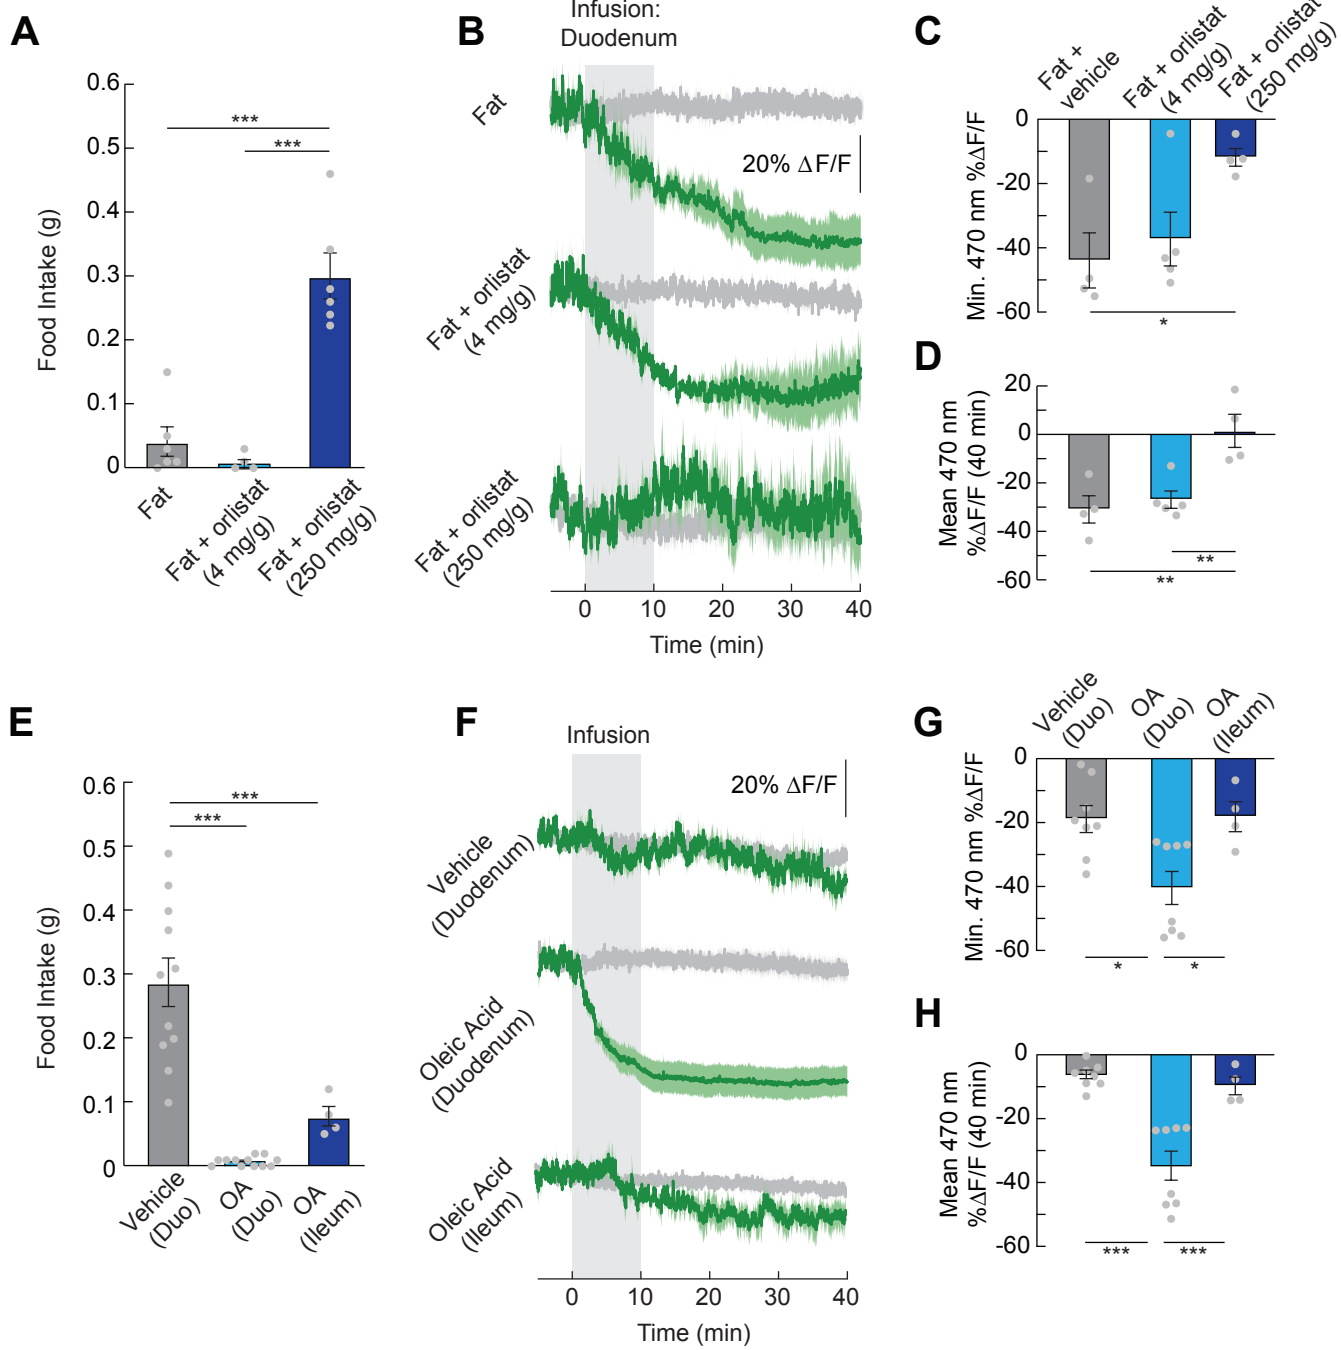

Figure S4, Related to Figure 1

**Figure S4, Related to Figure 1. Mechanisms for fat signaling to AgRP neurons.** (A) Food intake 30 min after intra-duodenal (ID) infusions of fat (1 kcal) or fat with lipase inhibitor (4 or 250 mg orlistat/g fat). (n=4-6/group, one-way ANOVA,  $p < 0.001$ ). (B) Average  $\Delta F/F$  of GCaMP6s signals in AgRP neurons of food-restricted mice during ID infusions of fat solutions in (A). Signals are aligned to the start of the infusion. Green, 470-nm calcium signal; grey, 405-nm control signal. Dark lines represent means and lighter shaded areas represent SEM. (C) Minimum  $\Delta F/F$  of the 470-nm signal in AgRP neurons during ID infusions of fat solutions in (B) (n=4-5/group, one-way ANOVA,  $p < 0.05$ ). (D) Mean  $\Delta F/F$  of the 470-nm signal from 0 to 40 min in AgRP neurons with ID infusion of fat solutions in (B) (n=4-5/group, one-way ANOVA,  $p < 0.01$ ). (E) Food intake 30 min after ID or IL infusion of vehicle or 12.5% oleic acid (n=4-12/group, one-way ANOVA,  $p < 0.001$ ). (F) Average  $\Delta F/F$  of GCaMP6s signals in AgRP neurons of during intra-duodenal or intra-ileal infusions of vehicle or 12.5% oleic acid. (G) Minimum  $\Delta F/F$  of the 470-nm signal in AgRP neurons with ID or IL infusion of solutions in (F) (n=4-8/group, one-way ANOVA,  $p < 0.01$ ). (H) Mean  $\Delta F/F$  of the 470-nm signal from 0 to 40 min in AgRP neurons with ID or IL infusion of solutions in (F) (n=4-8/group, one-way ANOVA,  $p < 0.001$ ). Data are expressed as mean  $\pm$  SEM, ns  $p > 0.05$ , t-tests and post-hoc comparisons: \* $p < 0.05$ , \*\* $p < 0.01$ , \*\*\* $p < 0.001$ .
